# Supplementary material for: Leptin Gene Epigenetic Adaptation to Impaired Glucose Metabolism During Pregnancy
Source: PubMed Central journal article supplement — Diabetes Care. 2010 Aug 19;33(11):2436–41. doi: 10.2337/dc10-1024 (PMC2963508; doi:10.2337/dc10-1024), 2010-08-19
Supplement: supp_dc10-1024_dc101024onlineappendix.pdf [file supp_dc10-1024_dc101024onlineappendix.pdf]

**Supplementary Table 1. CPG sites localisation according to the Ensembl release 56 (sept. 2009).**

| CpG position according to the amplicon | CpG position according to the Ensembl release 56 |
|----------------------------------------|--------------------------------------------------|
| 1                                      | -10699                                           |
| 2                                      | -10701                                           |
| 3                                      | -10704                                           |
| 4                                      | -10723                                           |
| 5                                      | -10729                                           |
| 6                                      | -10734                                           |
| 7                                      | -10743                                           |
| 8*                                     | -10761                                           |
| 9*                                     | -10775                                           |
| 10*                                    | -10780                                           |
| 11*                                    | -10793                                           |
| 12                                     | -10804                                           |
| 13                                     | -10813                                           |
| 14                                     | -10816                                           |
| 15                                     | -10827                                           |
| 16                                     | -10837                                           |
| 17                                     | -10842                                           |
| 18                                     | -10857                                           |
| 19                                     | -10860                                           |
| 20                                     | -10865                                           |
| 21                                     | -10869                                           |
| 22                                     | -10888                                           |
| 23                                     | -10902                                           |
| 24                                     | -10904                                           |
| 25                                     | -10912                                           |
| 26*                                    | -10925                                           |
| 27*                                    | -10928                                           |
| 28*                                    | -10930                                           |
| 29*                                    | -10942                                           |
| 30*                                    | -10944                                           |
| 31*                                    | -10946                                           |

Note: The CpG sites have been numbered relative to the first ATG located in exon 2. \*CpG that were analyzed in Melzner et al. (1).

1. Melzner I, Scott V, Dorsch K, Fischer P, Wabitsch M, Bruderlein S, Hasel C, Moller P: Leptin gene expression in human preadipocytes is switched on by maturation-induced demethylation of distinct CpGs in its proximal promoter. *J Biol Chem* 277:45420-45427, 2002
